# Supplementary material for: Chemical characterization and source apportionment of PM 2.5 in Beijing: seasonal perspective
Source: Copernicus journal article supplement (doi:10.5194/acp-13-7053-2013), 2013-07-25
Supplement: Supplementary file [file acp-13-7053-2013-supplement.pdf]

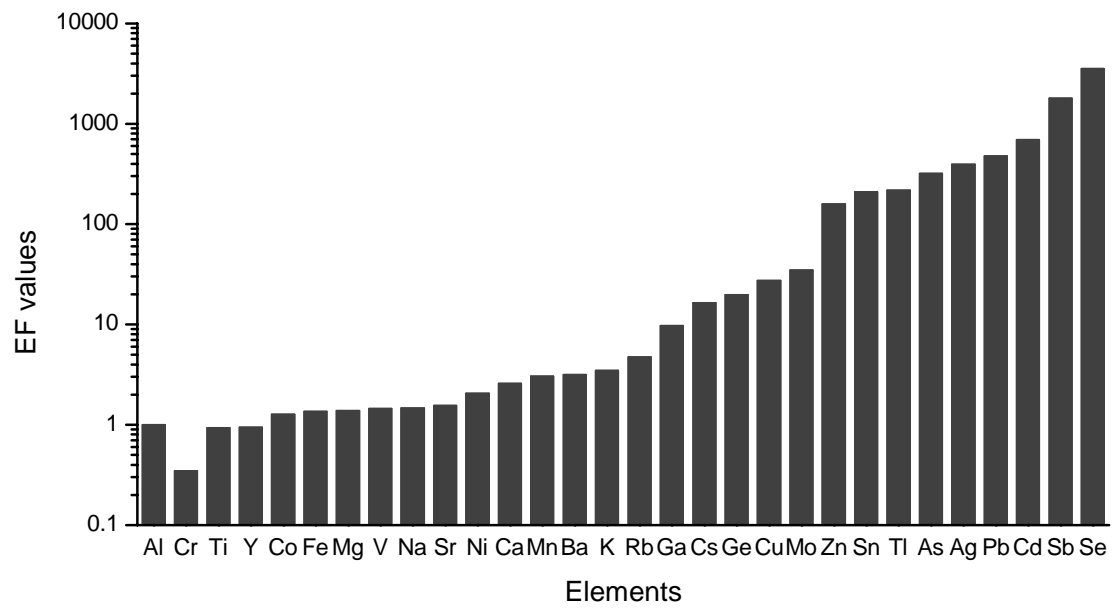

**Figure S1**

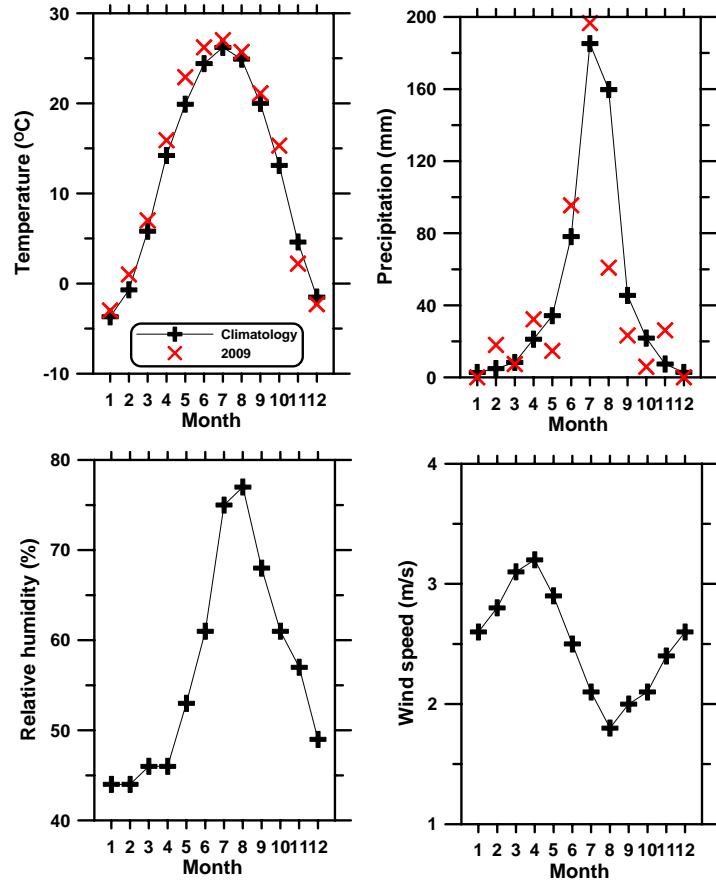

Figure S2

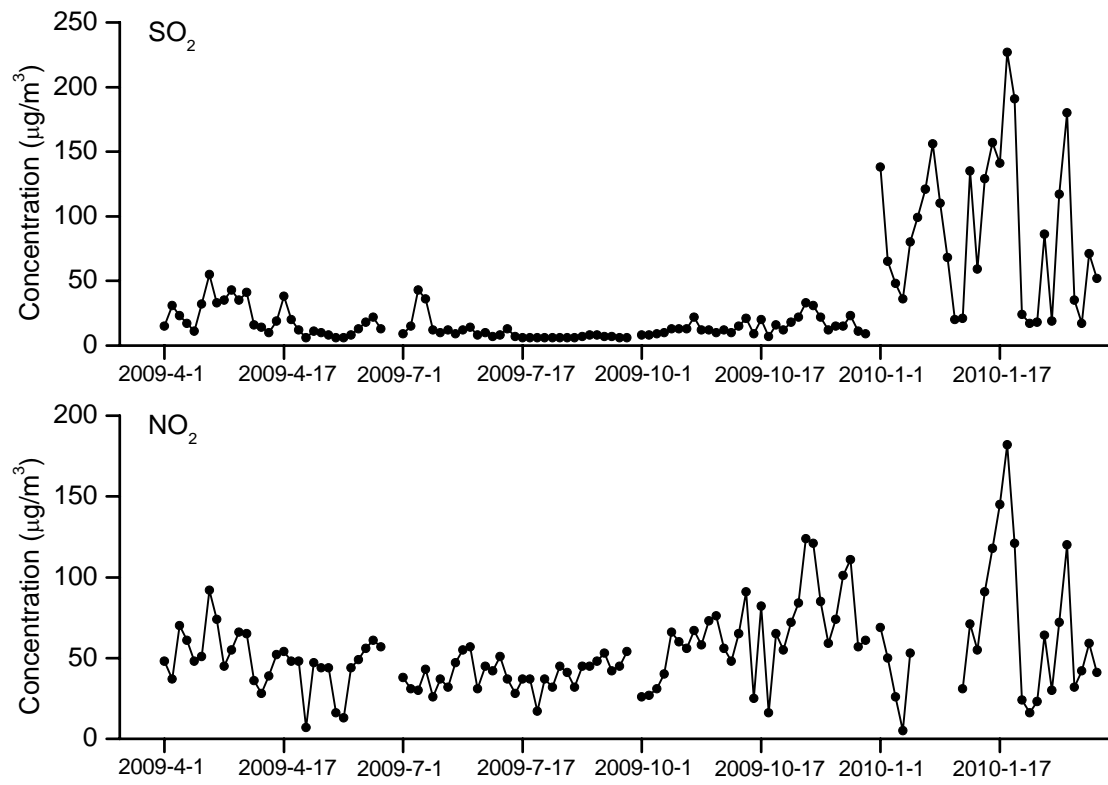

**Figure S3**

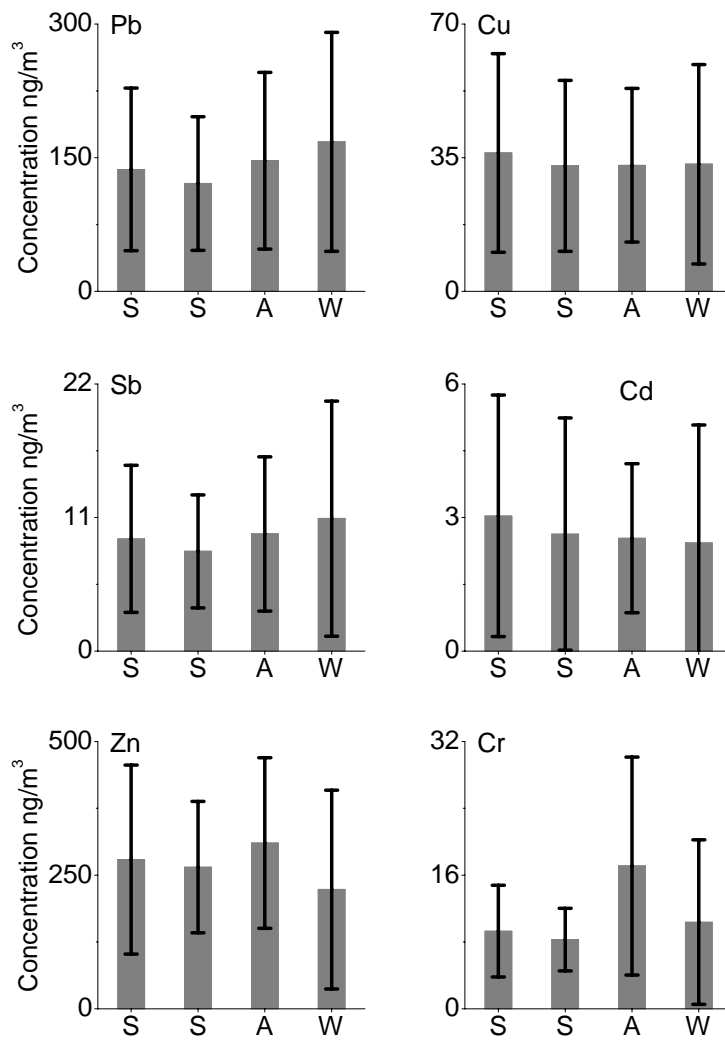

**Figure S4**
